# Supplementary material
Source: publisher site journal article supplement (https://www.spandidos-publications.com/1170/downloadSupplementary)
Supplement: Supplementary file 1 [file downloadSupplementary]

Figure S1. Relative expression levels of E2F1 and E2F3 were significantly higher in T-47D and MDA-MB-231 compared with in MCF-10A. E2F1 expression was 1.59-fold higher in T-47D ( $P<0.001$ ) and 1.81-fold higher in MDA-MB-231 cells ( $P<0.001$ ) compared with in MCF-10A. E2F3 expression levels were 1.67 fold-higher in T-47D ( $P<0.001$ ) and 1.5-fold higher in MDA-MB-231 cells ( $P<0.001$ ) compared with MCF-10A cells. E2F1, E2F transcription factor 1; E2F3, E2F transcription factor 3.

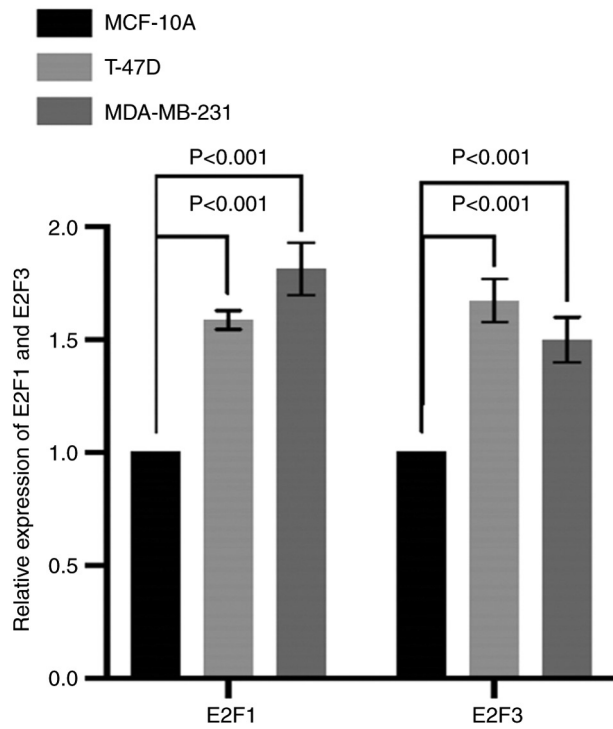

Figure S2. There is a positive correlation between E2F1 and E2F3 and miR-34a expression, and a negative correlation between E2F3 and miR-34a expression (data was obtained from datasets of TCGA breast cancer datasets) (<https://portal.gdc.cancer.gov/>). Correlation analyses of miRNA-seq and RNA-seq datasets of patients with breast cancer revealed a significantly positive correlation between E2F1 and E2F3 expression ( $r=0.39$ ,  $P=2.2 \times 10^{-16}$ ), a significantly negative correlation between E2F3 and miR-34a expression ( $r=-0.17$ ,  $P=2.19 \times 10^{-8}$ ) and a negative but not statistically significant correlation between E2F1 and miR-34a ( $r=-0.001$ ,  $P=0.96$ ). miR-34a, microRNA-34a; E2F1, E2F transcription factor 1; E2F3, E2F transcription factor 3; miRNA, microRNA.

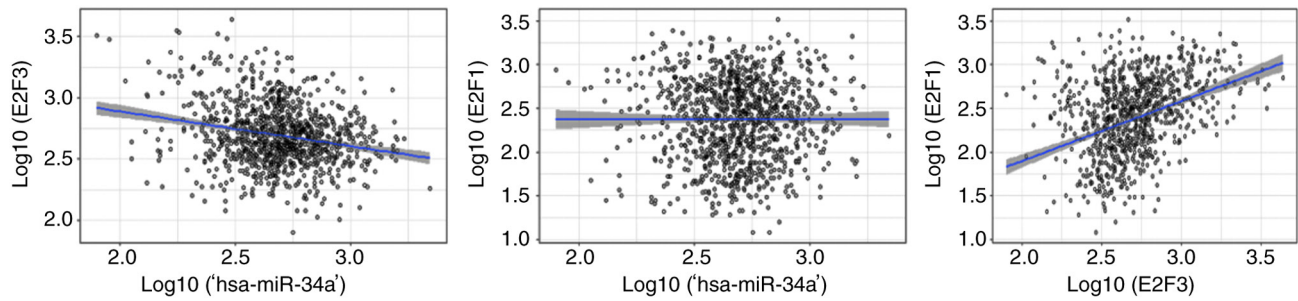

Table SI. Characteristics of populations and cancer types of the studies included in the meta-analysis.

| Study                         | Country       | Ethnicity            | Cancer type                     | Sample size<br>(cancer/normal)<br>in <i>E2F1</i> | Sample size<br>(cancer/normal)<br>in <i>E2F3</i> | (Refs.) |
|-------------------------------|---------------|----------------------|---------------------------------|--------------------------------------------------|--------------------------------------------------|---------|
| The Cancer Genome Atlas, 2011 | USA           | American             | Invasive<br>Breast<br>Carcinoma | 76/61                                            | 76/61                                            | (1)     |
| Gluck <i>et al</i> 2012       | USA           | American             | Invasive<br>Breast<br>Carcinoma | 154/4                                            | 154/4                                            | (2)     |
| Curtis <i>et al</i> 2012 2    | UK,<br>Canada | British,<br>Canadian | Invasive<br>Breast<br>Carcinoma | 21/144                                           |                                                  | (3)     |
| Curtis 2012 2                 | UK,<br>Canada | British,<br>Canadian | Breast<br>Carcinoma             | 14/144                                           |                                                  | (3)     |

E2F1, E2F transcription factor 1; E2F3, E2F transcription factor 3.

Table SII. Oligo primer sequences of genes in the present study.

| Gene         | Primer  | Base sequence                       |
|--------------|---------|-------------------------------------|
| <i>GAPDH</i> | Forward | 5'-GAAGGTGAAGGTCGGAGTC-3'           |
|              | Reverse | 5'-GAAGATGGTGATGGGATTTC-3'          |
| <i>E2F3</i>  | Forward | 5'-AAGAAATTAGATGAACTGATCCAAAGC-3'   |
|              | Reverse | 5'-TAACATAAGCTAACCTTTGATTCTCTGAA-3' |
| <i>E2F1</i>  | Forward | 5'-CATCCAGGAAAAGGTGTGAAATC-3'       |
|              | Reverse | 5'-AGGACGTTGGTGATGTCATAGATG-3'      |
| miR-34a      | Forward | 5'-CGTCACCTCTTAGGCTTGGA-3'          |
|              | Reverse | 5'-CATTGGTGTGCTTGTGCTCT-3'          |

miR, microRNA; E2F1, E2F transcription factor 1; E2F3, E2F transcription factor 3.

## References

1. The Cancer Genome Atlas-Invasive Breast Carcinoma Gene Expression Data. Data link: <http://tga-data.nci.nih.gov/tga/>
2. Curtis C, Shah SP, Chin SF, Turashvili G, Rueda OM, Dunning MJ, Speed D, Lynch AG, Samarajiwa S, Yuan Y, *et al*: The genomic and transcriptomic architecture of 2,000 breast tumours reveals novel subgroups. *Nature* 486: 346-352, 2012.
3. Glück S, Ross JS, Royce M, McKenna EF Jr, Perou CM, Avisar E and Wu L: TP53 genomics predict higher clinical and pathologic tumor response in operable early-stage breast cancer treated with docetaxel-capecitabine +/-trastuzumab. *Breast Cancer Res Treat* 132: 781-791, 2012.
